# Supplementary material
Source: PubMed Central journal article supplement (PMC5950709)
Supplement: NIHMS964678-supplement-S1.pdf [file NIHMS964678-supplement-S1.pdf]

Canagliflozin

| Case # | Age (Yrs) | Sex    | T2D; T1D; Unknown | Hospitalization (HO; OT) | Insulin | Metformin | Anti-hyperglycemic agents (AHA)                                                | Time from SGLT2i-start to DKA | Height | Weight    | BMI | Hemoglobin A1C | Blood Glucose (mg/dL) | pH       | Other lab results                                                                                                                                      | Notes                                                                                                                                          |                                                                                                                                         |
|--------|-----------|--------|-------------------|--------------------------|---------|-----------|--------------------------------------------------------------------------------|-------------------------------|--------|-----------|-----|----------------|-----------------------|----------|--------------------------------------------------------------------------------------------------------------------------------------------------------|------------------------------------------------------------------------------------------------------------------------------------------------|-----------------------------------------------------------------------------------------------------------------------------------------|
| 1      | 18        | Male   | T1D               | OT                       | 1       | 1         | Metformin<br>Insulin                                                           | Unknown                       | 63.8"  | 78.1kg    | 30  |                | 180                   |          | Large urine ketones                                                                                                                                    |                                                                                                                                                |                                                                                                                                         |
| 2      | 27        | Female | T1D               | HO; LT                   | 1       |           | Insulin                                                                        | 1 month                       |        |           |     | 24             | 7.8%                  | 150      | 6.89                                                                                                                                                   | Large urine ketones                                                                                                                            | <ul style="list-style-type: none"> <li>Insulin reduction</li> <li>URI, usual ETOH</li> <li>Peters case (Case #3)</li> </ul>             |
| 3      | 28        | Female | T1D               | HO; LT                   | 1       |           | Insulin                                                                        | 1 month;<br>2 months          |        | 133 lb    |     |                | 8.0%                  | 224; 221 |                                                                                                                                                        | Episode 1: Anion gap 22 mEq/L, positive serum and urine ketones<br>Episode 2: anion gap 17 mEq/L, strongly positive urine ketones              | <ul style="list-style-type: none"> <li>Peters case (Case #4)</li> <li>Social alcohol use</li> <li>Recurrent DKA (2 episodes)</li> </ul> |
| 4      | 28        | Female | T1D               | HO                       | 1       |           | Insulin                                                                        |                               | 60"    | 160lbs    |     |                | Euglycemia            |          | Urinary ketones                                                                                                                                        | <ul style="list-style-type: none"> <li>Insulin pump malfunction</li> </ul>                                                                     |                                                                                                                                         |
| 5      | 30        | Male   | T1D               | HO                       | 1       |           | Insulin                                                                        |                               | 64"    | 129lb     |     |                | 147                   |          | Urine Ketones<br>Anion Gap 24                                                                                                                          | <ul style="list-style-type: none"> <li>Rapid weight loss (13 lbs)</li> </ul>                                                                   |                                                                                                                                         |
| 6      | 30        | Female | T2D               | HO, LT                   |         |           | None                                                                           |                               | 66"    | 97.9kg    |     | 13.5%          | 252                   | 7        |                                                                                                                                                        |                                                                                                                                                |                                                                                                                                         |
| 7      | 31        | Female | T1D               | HO                       | 1       |           | Insulin                                                                        |                               |        |           |     |                |                       |          | Urine ketones                                                                                                                                          | <ul style="list-style-type: none"> <li>ETOH abuse</li> </ul>                                                                                   |                                                                                                                                         |
| 8      | 35        | Male   | T1D               | HO, OT                   | 1       |           | Insulin                                                                        | Within 4 weeks                | 74"    | 227 lbs   |     |                | <300                  |          | beta-hydroxybutyrate (BHB) 11.5, negative; then re-initiated care. BHB increased again 4.69 (units unspecified) in 1 day                               | <ul style="list-style-type: none"> <li>Acute gastroenteritis, kidney injury</li> </ul>                                                         |                                                                                                                                         |
| 9      | 37        | Female | T2D               | OT                       |         | 1         | Metformin                                                                      | Unknown                       |        | 210 lbs   |     |                | < 200                 | 7.3      | HCO3 18                                                                                                                                                |                                                                                                                                                |                                                                                                                                         |
| 10     | 37        | Female | T1D               | HO, OT                   | 1       |           | Insulin;<br>Symlin                                                             | Unknown                       | 66"    | 170 lbs   |     |                | 116                   |          | HCO3 13<br>Serum ketones positive                                                                                                                      | <ul style="list-style-type: none"> <li>Gastroenteritis, dehydration</li> </ul>                                                                 |                                                                                                                                         |
| 11     | 39        | Female | T1D               | HO, OT                   | 1       |           | Insulin                                                                        | 1 year                        |        |           |     | 7.0%           | 233                   |          | Anion gap 24 mEq/L<br>HCO3 9 mEq/L                                                                                                                     | <ul style="list-style-type: none"> <li>URI possibly PNA</li> <li>Peters (case)</li> </ul>                                                      |                                                                                                                                         |
| 12     | 40        | Female | T1D               | HO, LT                   |         |           |                                                                                | 2 weeks                       |        |           | 27  | 11.2%          | 220                   | 6.9      | HCO3 6 mEq/L<br>Anion gap 25 mEq/L<br>Serum ketones positive                                                                                           | <ul style="list-style-type: none"> <li>Cough, mild asthma, fever</li> <li>Basal insulin reduction 50%</li> </ul>                               |                                                                                                                                         |
| 13     | 41        | Male   | T1D               | HO                       | 1       |           | Insulin                                                                        |                               | 68"    | 199 lbs   |     |                |                       | 7        | HCO3 9 mEq/L<br>WBC 30,000                                                                                                                             | <ul style="list-style-type: none"> <li>Decreased total daily dose of insulin</li> <li>Recovering from pancreatitis</li> <li>DIA2004</li> </ul> |                                                                                                                                         |
| 14     | 42        | Female | T1D               | HO, LT                   | 1       |           | Insulin                                                                        |                               | 159 cm | 82 kgs    |     |                | 792                   | 6.89     | Anion gap (NR: 3-13) was 37 mmol/L<br>HCO3 5 (NR: 24-28) mmol/L                                                                                        | <ul style="list-style-type: none"> <li>Insulin pump malfunction</li> <li>DIA2004</li> </ul>                                                    |                                                                                                                                         |
| 15     | 43        | Female | T2D               | HO                       | 1       | 1         | Insulin;<br>Metformin                                                          | 1 week                        | 65"    | 247 lbs   |     |                | 269                   | 7.124    | HCO3 of 8<br>Leukocytosis                                                                                                                              | <ul style="list-style-type: none"> <li>Reduction in insulin</li> </ul>                                                                         |                                                                                                                                         |
| 16     | 44        | Male   | T1D               | HO, LT                   | 1       |           | Insulin                                                                        |                               | 70"    | 143 lbs   |     |                | 500                   |          | Anion gap 31<br>creatinine 2.3<br>HCO3 of 8<br>WBC of 22                                                                                               | <ul style="list-style-type: none"> <li>Disconnected insulin pump (urgent care prior)</li> <li>DIA2004</li> </ul>                               |                                                                                                                                         |
| 17     | 46        | Male   | T1D               | OT                       | 1       | 1         | Insulin;<br>Metformin                                                          |                               | 162cm  | 77kg      | 29  | 8.1%           | 179                   | 7.25     | WBC 5500/mL<br>HCO3 15.6mEq/L<br>lactic acid 2.1mM<br>blood total ketones 8480 micromol/L (acetoacetic acid 1383; hydroxybutyric acid 7097 micromol/L) | <ul style="list-style-type: none"> <li>Discontinued insulin</li> </ul>                                                                         |                                                                                                                                         |
| 18     | 47        | Male   | T2D               | HO                       |         | 1         | Metformin<br>;<br>Sulfonylurea                                                 |                               |        |           |     |                | 277                   |          | Highly positive serum ketones                                                                                                                          |                                                                                                                                                |                                                                                                                                         |
| 19     | 48        | Male   | T2D               | HO                       | 1       |           | Insulin                                                                        | Unknown                       | 72"    | 289 lbs   |     |                |                       | 7.2      | HCO3 10<br>Positive urine ketones                                                                                                                      |                                                                                                                                                |                                                                                                                                         |
| 20     | 48        | Female | T2D               | HO, LT                   | 1       | 1         | Insulin;<br>Metformin                                                          | Within 4 months               | 64"    | 171       |     | 10.3%          | 201                   | 6.8      |                                                                                                                                                        | <ul style="list-style-type: none"> <li>Low carbohydrate diet</li> </ul>                                                                        |                                                                                                                                         |
| 21     | 49        | Female | T2D               | HO, LT                   |         |           | Unknown                                                                        |                               |        |           |     | 8.5%           | Euglycemia*           | 7.03     | Anion gap 34<br>HCO3 5                                                                                                                                 |                                                                                                                                                |                                                                                                                                         |
| 22     | 51        | Female | T1D               | HO, OT                   | 1       |           | Insulin                                                                        | Unknown                       |        |           |     |                | 240                   | 7.18     | Anion gap 27 mmol/l<br>HCO3 9<br>+4 urinary ketones and glucose                                                                                        | <ul style="list-style-type: none"> <li>No precipitating event identified</li> </ul>                                                            |                                                                                                                                         |
| 23     | 52        | Male   | T2D               | HO                       |         | 1         | Glyburide;<br>Metformin                                                        | Unknown                       |        |           |     |                | 150                   |          | beta-hydroxybutyrate level 5.05                                                                                                                        |                                                                                                                                                |                                                                                                                                         |
| 24     | 52        | Female | T2D               | HO                       |         | 1         | Metformin                                                                      | Unknown                       |        | 165.3 lbs |     |                | 167                   |          | Anion gap 19<br>Lactic acid 3.0<br>Creatinine 3.44                                                                                                     | <ul style="list-style-type: none"> <li>Acute kidney failure, lactic acidosis</li> <li>Recent URI</li> </ul>                                    |                                                                                                                                         |
| 25     | 52        | Female | T2D               | HO, LT                   | 1       | 1         | Insulin;<br>Metformin                                                          | Unknown                       | 70"    | 167 lbs   |     |                | 69                    |          | CO2 10 meq/L<br>Positive serum ketones                                                                                                                 | <ul style="list-style-type: none"> <li>Diffuse urticaria and nausea and vomiting after initiating SGLT2 inhibitor</li> </ul>                   |                                                                                                                                         |
| 26     | 55        | Male   | T2D               | HO                       |         | 1         | Metformin                                                                      | 2 weeks                       |        | 123 kgs   |     |                | 240                   | 7.15     | HCO3 12, lactic acid 3.9, WBC 12.8                                                                                                                     | <ul style="list-style-type: none"> <li>After initiation of SGLT2 inhibitor lost 25 lbs</li> <li>"super-responder?"</li> </ul>                  |                                                                                                                                         |
| 27     | 55        | Female | Unknown           | HO                       |         |           |                                                                                |                               | 67"    | 140 lbs   |     |                | 140                   | 6.97     |                                                                                                                                                        |                                                                                                                                                |                                                                                                                                         |
| 28     | 57        | Male   | T2D               | HO, OT                   |         | 1         | Exenatide<br>;<br>Glipizide;<br>Metformin<br>;<br>Sitagliptin;<br>Pioglitazone |                               |        | 223 lbs   |     |                | 116                   | 7.1      | Anion gap 14,<br>HCO3 6, serum ketones 6.3 mM (reference <0.4), lactate 8 mg/dL (reference <20), osmolar gap 21, urine ketone body 80 mg/dL            |                                                                                                                                                |                                                                                                                                         |
| 29     | 59        | Female | T2D               | HO                       |         |           | Glimicron;<br>Victoza                                                          |                               | 160cm  | 67 kg     |     | 8.6%           | 286                   | 7.03     | Urine ketone body 14510 mg/dl                                                                                                                          | <ul style="list-style-type: none"> <li>Influenza A</li> </ul>                                                                                  |                                                                                                                                         |
| 30     | 61        | Female | T1D               | HO                       |         | 1         | Metformin                                                                      |                               |        |           |     | 7.7%           | 272                   |          | HCO3 7, serum ketones positive                                                                                                                         | <ul style="list-style-type: none"> <li>Diagnosed with T1D following DKA</li> </ul>                                                             |                                                                                                                                         |

|    |    |        |         |    |   |   |           |            |       |         |    |       |       |  |                                                     |                                                                                                                                                            |
|----|----|--------|---------|----|---|---|-----------|------------|-------|---------|----|-------|-------|--|-----------------------------------------------------|------------------------------------------------------------------------------------------------------------------------------------------------------------|
| 31 | 61 | Female | T2D     | HO |   | 1 | Metformin |            | 150cm | 73kg    |    | 16.0% | 405   |  | Urine ketones 40 (units unspecified)                | <ul style="list-style-type: none"> <li>Complained of malaise</li> <li>Recent addition of GLP1 analog</li> <li>Weight loss &gt; 10kg in 4 months</li> </ul> |
| 32 | 62 | Male   | T2D     | HO |   |   | None      | 18 days    |       | 88.6 kg |    | 10.5% | 571   |  | Urine ketones                                       | <ul style="list-style-type: none"> <li>Weakness, 'routable' vomiting, thirst</li> <li>Abscess</li> <li>DIA3011</li> </ul>                                  |
| 33 | 85 | Female | T2D     | OT |   |   | None      | 3 days     | 62"   | 110 lbs |    |       |       |  | Urinary Ketones<br>Platelet count 533               | <ul style="list-style-type: none"> <li>Dehydration</li> </ul>                                                                                              |
| 34 |    |        | Unknown | HO |   |   |           |            |       |         |    |       | 230   |  | HCO3 critically low<br>Anion gap very high          | <ul style="list-style-type: none"> <li>Nausea and vomiting</li> </ul>                                                                                      |
| 35 |    | Female | T1D     | OT | 1 |   | Insulin   |            |       |         | 32 | 6.7%  | 105   |  | Urine ketones                                       | <ul style="list-style-type: none"> <li>Exercise</li> <li>Insulin stopped</li> </ul>                                                                        |
| 36 |    | Female | T1D     |    | 1 |   | Insulin   |            |       |         |    |       | < 200 |  | Urine ketones                                       |                                                                                                                                                            |
| 37 |    |        | T2D     |    | 1 |   | Insulin   | 3 weeks    |       |         |    |       |       |  | Positive ketones<br>Anion gap acidosis<br>Lactate 8 | <ul style="list-style-type: none"> <li>Atkins diet</li> </ul>                                                                                              |
| 38 |    |        | T2D     |    |   |   |           |            |       |         |    |       |       |  | Beta-hydroxybutyrate 11                             |                                                                                                                                                            |
| 39 |    | Female | Unknown |    |   |   |           | A few days |       |         |    |       | 90    |  | High anion gap acidosis                             |                                                                                                                                                            |

Dapagliflozin

| Case # | Age in Years | Sex    | Indication (T1D; T2D; unknown type) | Hospitalization | Metformin | Insulin | Anti-hyperglycemic agents                                           | SGLT2i start to DKA | Presenting BG (mg/dL) [*by report] | Hemoglobin A1C | Urinary Ketones (+ or mmol/L) | pH    | Other lab results                                                                        | Co-existing/predisposing illness                                       |
|--------|--------------|--------|-------------------------------------|-----------------|-----------|---------|---------------------------------------------------------------------|---------------------|------------------------------------|----------------|-------------------------------|-------|------------------------------------------------------------------------------------------|------------------------------------------------------------------------|
| 1      | 34           | Male   | Unknown                             | HO, LT          | 1         | 1       | Gliclazide; Metformin; Insulin Lantus                               | 7 mo                | 187                                |                | 7.8                           | 6.9   | HCO3: 5.7 mmol/L<br>Base Excess: (-27.4mmol/L)                                           | • History of laparotomy for bowel obstruction                          |
| 2      | 35           | Male   | Unknown                             | HO, OT, LT      | 1         | 1       | Metformin; Gliclazide; Insulin                                      |                     | 176                                |                |                               | 6.9   |                                                                                          | • ETOH history                                                         |
| 3      | 36           | Female | Unknown                             | LT              | 1         | 1       | Insulin; Metformin                                                  |                     | 106                                |                | 15.6                          | 7.34  | HCO3: 19 mmol/L<br>Base Excess: (-4.9 mmol/L)<br>Lactate: 0.8mmol/L                      | • DKA 4 days post-op Whipple procedure                                 |
| 4      | 40           | Female | T2D                                 | HO, LT          |           | 1       | Insulin Levemir; Novolog                                            | 3 months            | 267                                |                |                               | 7.08  | Base Excess: (-16.4 mmol/L)                                                              | • URI<br>• Upon re-initiation of SGLT2i, recurrent DKA                 |
| 5      | 48           | Female | T2D                                 | LT              |           |         | Pioglitazone; Teneigiptin                                           |                     |                                    |                | 4+                            |       | Normal Lactate 0.7 mmol/L                                                                | • URI and fever                                                        |
| 6      | 51           | Male   | T2D                                 | HO              | 1         |         | Glipizide; Metformin                                                |                     | 157                                |                | +                             |       | Normal Lactate                                                                           | • Recurrent DKA after insulin gtt stopped                              |
| 7      | 64           | Female | T2D                                 | HO              | 1         | 1       | Insulin; Glimepiride; Alogliptin; Metformin                         |                     | 198                                |                | 4+                            | 7.134 |                                                                                          | • Stopped basal insulin                                                |
| 8      | 65           | Female | T1D                                 | DE              | 1         | 1       | Insulin Humalog; Lantus; Metformin                                  | 2.3 months          | 411                                |                |                               | 6.8   | Anion gap 33 mmol/L<br>Base excess (-33 mmol/L)<br>HCO3 4.2 mmol/L<br>Lactate 6.4 mmol/L | • History of renal impairment<br>• Death attributed to lactic acidosis |
| 9      | 69           | Female | T2D                                 | LT              | 1         |         | Metformin                                                           |                     |                                    |                |                               | 6.91  | Lactate > 20 mmol/L                                                                      | • Peri-surgical<br>• Lactic acidosis<br>• Acute kidney injury          |
| 10     | 70           | Female | T2D                                 | HO              |           |         | Glimepiride; Sitagliptin; Miglitol                                  |                     | 450                                | 12%            |                               | 7.2   | HCO3 10.1 mmol/L<br>Serum ketones 15250 mcmol/L<br>B-hydroxybutyric acid 11440 mcol/L    |                                                                        |
| 11     | 77           | Male   | T2D                                 | HO, OT          | 1         |         | "Glufast"; Sitagliptin; Metgluco; Pioglitazone; Miglitol; Voglibose | 2 weeks             | 188                                | 8.60%          | 3+                            | 7.3   | Serum ketones 9740 mcmol/L<br>Lactate 7.2                                                | • Weight loss 10kg; smoker; Alzheimers<br>• Physician suspected DKA    |

**Empagliflozin**

| Case # | Age in Years | Sex    | Indication (T1D; T2D; unknown) | Anti-hyperglycemic agents (AHA) | Hospitalization | Time from SGLT2i-start to DKA | BMI | Hemoglobin A1C | Blood glucose level (mg/dL) | pH  | Other lab results   | Co-existing/predisposing illness                                                             |
|--------|--------------|--------|--------------------------------|---------------------------------|-----------------|-------------------------------|-----|----------------|-----------------------------|-----|---------------------|----------------------------------------------------------------------------------------------|
| 1      | 43           | Female | Type 1 diabetes mellitus       | Insulin                         | HO, OT          |                               | 30  |                |                             | 7.1 | Anion gap 50 mmol/L | <ul style="list-style-type: none"><li>▪ Suspected flu</li><li>▪ Severe dehydration</li></ul> |

Sitagliptin

| Case Number | Age (Yrs) | Sex | T2D; T1D; Unknown | Anti-hyperglycemic agents (AHA)                   | Height | Weight | BMI  | Hemoglobin A1C | Blood Glucose (mg/dL) | pH               | Other lab results                                                                                                                                                                                                                              | Co-existing/predisposing illness                                                                                                                                                                                                                                    |
|-------------|-----------|-----|-------------------|---------------------------------------------------|--------|--------|------|----------------|-----------------------|------------------|------------------------------------------------------------------------------------------------------------------------------------------------------------------------------------------------------------------------------------------------|---------------------------------------------------------------------------------------------------------------------------------------------------------------------------------------------------------------------------------------------------------------------|
| 1           | 48        | M   | T2D               | Sitagliptin                                       |        |        |      |                | 154                   |                  | insulin 6.0 μUnits/mL, hyponatraemia at 122 mEq/L, hypochloreaemia at 51 mEq/L, hypokalaemia at 2.7 mEq/L.                                                                                                                                     | Ketosis, hyperchloreaemia, overdose, metabolic alkalosis, hypernatraemia, hypokalaemia, altered state of consciousness, vomiting, blood pressure decreased.                                                                                                         |
| 2           | 67        | F   | T2D               | Sitagliptin, Metformin                            |        |        |      |                |                       | 7.03             | Hyperkalaemia at 9 mmol/L, lactatemia at 7.9 mmol/L, an acute renal failure with MDRD clearance at 7 mL/min.                                                                                                                                   | Lactic acidosis, arterial hypertension, non-insulin-dependent diabetes mellitus, diabetic neuropathy, chronic renal insufficiency and obesity.                                                                                                                      |
| 3           | 57        | M   | T2D               | Sitagliptin, Metformin                            | 180 cm | 80 kg  |      |                |                       | < 7              | Lactate < 10 mmol/L                                                                                                                                                                                                                            | Lactic acidosis, alcohol abuse, nicotine abuse, hypertension and diabetes nephropathy.                                                                                                                                                                              |
| 4           | 64        | F   | T2D               | Sitagliptin, Metformin                            |        |        |      |                |                       | 7                | PO2 at 130 mmHg, PCO2 at 16.4 mmHg, bicarbonate at 6.1 mmol/L, potassium at 6.3 mmol/L, sodium at 133 mmol/L, creatinine at 39.16 mg/l, urea at 0.90 g/l and lactate at 1000                                                                   | Lactic acidosis, pemphigoid.                                                                                                                                                                                                                                        |
| 5           | 80        | F   | T2D               | Sitagliptin, Metformin                            |        |        | 18.6 | 5.60%          | 336                   | 6.68             | HCO3 2.9; lactic acid, 14.7 mmol/L (264.5 mg/dL)                                                                                                                                                                                               | Lactic acidosis                                                                                                                                                                                                                                                     |
| 6           | 62        | F   | T2D               | Sitagliptin, Metformin                            |        |        |      |                |                       | 7.29             | HC03 8.7 mmol/L, anion gap 35.5 mEq/L, lactic acid of 21.4 mmol/L                                                                                                                                                                              | Lactic acidosis, chronic atrial flutter, chronic heart failure, and heparin-induced thrombocytopenia.                                                                                                                                                               |
| 7           | 79        | M   | T2D               | Sitagliptin, Metformin                            |        |        |      |                |                       |                  |                                                                                                                                                                                                                                                | Lactic acidosis, renal failure acute, and hypovolaemic shock.                                                                                                                                                                                                       |
| 8           | U         | F   | T2D               | Sitagliptin, Buformin                             |        |        |      |                |                       | 6.72             | Lactate of 30 mmol/L, blood buformin level which had been markedly high at 3,790 ng/mL (Cmax of 260-410 ng/mL) on arrival decreased to 940 ng/mL after hemodialysis.                                                                           | Lactic acidosis                                                                                                                                                                                                                                                     |
| 9           | 35        | M   | T2D               | Sitagliptin, Metformin, Ipragliflozin             |        |        |      | 11.40%         | 186                   | 7.17; 7.40       | U-Ketone was 3+; HC03 of 4.6 mEq/mL, total blood ketone body was 13,016 mcmol/L; acetoacetic acid was 2,857 mcmol/L; and 3-hydroxybutyric acid was 10,159 mcmol/L.                                                                             | Ketoacidosis, dehydration                                                                                                                                                                                                                                           |
| 10          | 53        | F   | Unknown           | Sitagliptin, Metformin                            |        |        |      |                |                       | 7.27             | lactate 8.1 mmol/L.                                                                                                                                                                                                                            | Lactic acidosis, intentional Metformin overdose                                                                                                                                                                                                                     |
| 11          | 70        | F   | Unknown           | Sitagliptin, Metformin                            |        |        |      |                |                       |                  |                                                                                                                                                                                                                                                | Lactic acidosis, dehydration, acute kidney injury                                                                                                                                                                                                                   |
| 12          | 45        | F   | Unknown           | Sitagliptin, Metformin                            |        |        |      |                | 293                   | 6.91; 7.17       | lactate 18.1 mmol/L, acetaminophen and salicylate not detected, and ethanol 80 mg/dL, anion gap 33; lactate 24.5 mmol/L; WBC 34.2; Hgb 7.1; ethanol 53 mg/dL; AST 541; and ALT 134. hemodialyzed on hospital days 1 and 2 for lactic acidosis. | Lactic acidosis, alanine aminotransferase increased, body temperature decreased, respiratory rate increased, aspartate aminotransferase increased, overdose, death                                                                                                  |
| 13          | 75        | M   | T2D               | Sitagliptin, Metformin                            |        |        |      |                |                       |                  |                                                                                                                                                                                                                                                | Lactic acidosis, hyperkalaemia, overdose, acute kidney injury, cardiac arrest, coma                                                                                                                                                                                 |
| 14          | 38        | F   | T2D               | Sitagliptin                                       |        |        |      |                |                       | 7.3              | pH: 7.3, arterial blood partial pressure of oxygen (pO2) 71, and arterial blood partial pressure of carbon dioxide (pCO2) 49.                                                                                                                  | Acidosis, acute kidney injury, respiratory disorder                                                                                                                                                                                                                 |
| 15          | 73        | F   | T2D               | Sitagliptin, Metformin                            |        |        |      |                |                       |                  |                                                                                                                                                                                                                                                | Lactic acidosis, acute kidney injury, obesity                                                                                                                                                                                                                       |
| 16          | 66        | F   | T2D               | Sitagliptin                                       |        |        |      |                |                       |                  |                                                                                                                                                                                                                                                | Lactic acidosis, abdominal pain, pancreatis acute                                                                                                                                                                                                                   |
| 17          | 53        | M   | T2D               | Sitagliptin, Metformin                            |        |        |      |                |                       | 6.86             | Hypoglycemia at 0.49 g/l, hypothermia at 33.7C. The blood gases found a hyperlactataemia at 26 (normal value = 0.5 to 2.0) and an unknown renal failure at 788 micromol/l.                                                                     | Lactic acidosis, cardio-respiratory arrest, acute kidney injury, drug interaction, overdose                                                                                                                                                                         |
| 18          | 68        | F   | Unknown           | Sitagliptin, Metformin                            |        |        |      |                |                       | 7.03             | Creatinemia was at 391 micromol/l, and lactic acidosis was discovered: venous lactates at 10.87 mmol/l (normal between 0.5 and 2.20) and arterial lactates at 14.41 mmol/l (normal between 0.3 and 1.30). Hyperkalemia at 7.77 mmol/l          | Metabolic acidosis, drug interaction                                                                                                                                                                                                                                |
| 19          | 59        | M   | T2D               | Sitagliptin, Metformin, Metformin, Glucicazide    |        |        |      |                |                       | 7.05             | pCO2 11 mmHg, bicarbonate (HCO3) 3.0 mmol/L (arterial blood), K 6.97 mmol/L, HCO3 3.1 mmol/L, MDRD 10.05 mL/L, Lactic acid 2.95 mmol/L.                                                                                                        | Lactic acidosis, metabolic acidosis, calculus ureteric, hydronephrosis, hypotension, pulmonary oedema, renal failure                                                                                                                                                |
| 20          | 65        | F   | T2D               | Sitagliptin, Metformin                            |        |        |      |                |                       | 7.35             | creatinine at 326 mol/L, digoxin level in blood was measured at 6.47 nmol / L (normal value inferior to 2 nmol/L), creatinine 211 mol / L, pH 7.35, pO2 13.5 kPa, pCO2 2.56 kPa, HCO 3 10.3 mmol / L, lactate 7.39 mmol / L                    | Lactic acidosis, acute kidney injury, drug level above therapeutic                                                                                                                                                                                                  |
| 21          | 58        | F   | Unknown           | Sitagliptin, Metformin, Climepride, Dapagliflozin |        |        |      |                |                       |                  | Ketones 4.4                                                                                                                                                                                                                                    | Ketoacidosis, blood glucose increase                                                                                                                                                                                                                                |
| 22          | 45        | F   | Unknown           | Sitagliptin, Metformin                            |        |        |      |                | 101; 293              | 6.91; 7.17       | bicarbonate:6, BUN:15, creatinine:1.3 glucose was 101. Lactate 18.1 mmol/L; acetaminophen and salicylate not detected;                                                                                                                         | Lactic acidosis, unresponsive to stimuli, faecal incontinence, completed suicide, hypotension, overdose, dysarthria                                                                                                                                                 |
| 23          | 71        | F   | Unknown           | Sitagliptin, Metformin                            |        |        |      |                | 155                   | 7.25; 7.26; 6.89 | Creatinine (CR ) 2, UREA 108, PH 7.25, HCO3 17. Blood lactic acid (LACT) 93                                                                                                                                                                    | Lactic acidosis                                                                                                                                                                                                                                                     |
| 24          | 64        | F   | Unknown           | Sitagliptin                                       |        |        |      |                |                       |                  | UDS positive for benzodiazepines                                                                                                                                                                                                               | Acidosis, agitation, anuria, atrial fibrillation, blood pressure systolic decreased, completed suicide, dialysis, heart rate decreased, hypertension, mydriasis, nodal rhythm, tachycardia, thrombocytopenia, toxicity to various agents, ventricular extrasystoles |
| 25          | 39        | M   | T2D               | Sitagliptin, Metformin                            |        |        |      |                |                       |                  |                                                                                                                                                                                                                                                | Lactic acidosis, suicide attempt, dilated cardiomyopathy, hyperuricemia, depression, and schizophrenia.                                                                                                                                                             |
| 26          | 65        | M   | T2D               | Sitagliptin, Metformin                            |        |        |      |                | 121                   | 6.84; 7.38       | pH : 6.84 (N 7.35 - 7.45), blood lactic acid 12.6 mmol/l (N 0.5-2.0 mmol/l),                                                                                                                                                                   | Metabolic acidosis                                                                                                                                                                                                                                                  |

|    |    |   |         |                                         |  |  |  |  |    |          |                                                                                                                                                                                                                   |                                                                                                                     |
|----|----|---|---------|-----------------------------------------|--|--|--|--|----|----------|-------------------------------------------------------------------------------------------------------------------------------------------------------------------------------------------------------------------|---------------------------------------------------------------------------------------------------------------------|
| 27 | 59 | F | Unknown | Sitagliptin,<br>Metformin,<br>Diamicron |  |  |  |  | 70 | 6.59     | pH 6.59, pCO2 at 32, lactate at 20 mmol / l, renal insuffisance with creatinemia at 731 micromol / l and hyperphosphatemia. Plasma metformin concentration was at 47.5 microg / l and intra erythrocyte at 16. 7. | Lactic acidosis, coma, diarrhoea, general physical health deterioran, renal failure, respiratory distress, vomiting |
| 28 | 74 | M | T2D     | Sitagliptin,<br>Metformin               |  |  |  |  |    | 6.8; 7.4 | blood bicarbonate 4, pH 6.8, potassium was at 5.8, INR was at 5.29 and lactate was at 17.                                                                                                                         | Metabolic acidosis, acute kidney injury, cardiac failure, cardiac arrest                                            |
| 29 | 53 | F | Unknown | Sitagliptin,<br>Metformin               |  |  |  |  |    | 7.27     | Lactate 8.1 mmol/L                                                                                                                                                                                                | Lactic acidosis, intentional overdose, toxicity to various agents                                                   |

**Saxagliptin**

| Case Number | Age (Yrs) | Sex | T2D; T1D; Unknwon | Anti-hyperglycemic agents (AHA)                  | Insulin | Blood Glucose (mg/dL) | pH | Other lab results                                            | Co-existing/predisposing illness                                                        |
|-------------|-----------|-----|-------------------|--------------------------------------------------|---------|-----------------------|----|--------------------------------------------------------------|-----------------------------------------------------------------------------------------|
| 1           | 68        | M   | Unknown           | Metformin, Saxagliptin                           |         |                       |    |                                                              | Ketoacidosis, pain in extremity, paraesthesia                                           |
| 2           | 56        | F   | T2D               | Saxagliptin, Metformin                           |         |                       |    |                                                              | Lactic acidosis, sepsis                                                                 |
| 3           | 68        | M   | T2D               | Saxagliptin, Metformin, glargine                 | Yes     |                       |    |                                                              | Lactic acidosis, acute prerenal failure, gastroenteritis                                |
| 4           | 63        | F   | T2D               | Saxagliptin, Metformin, Humalog, Levemir, Lantus | Yes     | 342                   |    | Serum creatinine 2.6 mg/dL, BUN 37 mg/dL, anion gap 22 mEq/L | Diabetic ketoacidosis, dehydration, diarrhoea, nausea, pain, renal impairment, vomiting |
| 5           | 50        | M   | Unknown           | Saxagliptin, Metformin                           |         |                       |    |                                                              | Acidosis, malaise, renal disorder                                                       |
